# Supplementary material for: A Prospective Study of Growth and Biomarkers of Exposure to Aflatoxin and Fumonisin during Early Childhood in Tanzania
Source: PubMed Central journal article supplement (PMC4314247; doi:10.1289/ehp.1408097), 2014-10-17
Supplement: ehp.1408097.s001.508.pdf [file ehp.1408097.s001.508.pdf]

**Supplemental Material**

**A Prospective Study of Growth and Biomarkers of Exposure to  
Aflatoxin and Fumonisin during Early Childhood in Tanzania**

Candida P. Shirima, Martin E. Kimanya, Michael N. Routledge, Chou Srey, Joyce L. Kinabo,  
Hans-Ulrich Humpf, Christopher P. Wild, and Yun Yun Gong

## Sample size calculation

Sample size was calculated according to the formula by Daniel, (1999) cited by Naing *et al.* (2006) as follows: -  $n = [Z^2 P(1 - P)]/d^2$  whereby; n = sample size, Z = Z statistic for a level of confidence; (1.96 at confidence level of 95%), P = 0.9 (According to earlier study by Kimanya *et al.*, (2008) which found that 10% of infants consumed maize contaminated with both aflatoxins and fumonisins) and d= 0.05 as precision is 5%. Therefore,  $n=1.96 \times 1.96 \times 0.9(1 - 0.9)/0.05 \times 0.05=138$ . Assuming 20% possible drop out rate, sample size was adjusted to  $n=138+(20/100*138)=166$ . It was also expected that a group of 166 children with collection of biomarker samples for analysis of mycotoxins exposure and taking growth measurements for 3 surveys would provide a reasonably large number of samples even after dropouts.

## Reference

Naing L, Winn T, Rusli B. 2006. Practical issues in calculating the sample size for prevalence studies. Archives of Orofacial Sciences 1(1): 9-14.

**Table S1.** Types of foods consumed and estimated average intake (g/kg body weight unless otherwise indicated) by all children at recruitment according to village.

| <b>Type of food</b> | <b>Nyabula village</b> | <b>Kigwa village</b> | <b>Kikelelwa village</b> |
|---------------------|------------------------|----------------------|--------------------------|
| Rice                | 4.5                    | 5                    | 2.5                      |
| Potatoes            | 0.6                    | 2.1                  | 9.1                      |
| Vegetables          | 8.7                    | 6.1                  | 4.4                      |
| Green banana        | 0                      | 0                    | 13.8                     |
| Beans               | 3.5                    | 3                    | 4.4                      |
| Meat                | 3.9                    | 5                    | 4.3                      |
| Fruits              | 0.5                    | 1.4                  | 0.9                      |
| Wheat               | 0.7                    | 0.4                  | 1.6                      |
| Cassava             | 0.1                    | 0                    | 0.1                      |
| Finger millet       | 1.2                    | 0.9                  | 0.8                      |
| Milk <sup>a</sup>   | 7.5                    | 5.2                  | 15.9                     |

<sup>a</sup>Unit is in mL/kg body weight.

**Table S2.** Estimated average maize intake by sampling time and village (g/kg body weight/day, mean  $\pm$  SD).

| <b>Sampling time</b>        | <b>Nyabula</b>  | <b>Kigwa</b>   | <b>Kikelelwa</b> | <b>All villages</b> |
|-----------------------------|-----------------|----------------|------------------|---------------------|
| At recruitment              | 10.6 $\pm$ 4.3* | 7.8 $\pm$ 4.1  | 7.7 $\pm$ 4.5    | 8.8 $\pm$ 4.5       |
| 6 months after recruitment  | 12.1 $\pm$ 5.8* | 8.9 $\pm$ 5.8  | 7.9 $\pm$ 3.6    | 9.8 $\pm$ 5.4       |
| 12 months after recruitment | 13.4 $\pm$ 4.5  | 12.9 $\pm$ 4.8 | 9.9 $\pm$ 5.7*   | 12.0 $\pm$ 5.3      |

\*At recruitment, maize intake was significantly higher at Nyabula than other villages ( $p < 0.01$ ); at six months from recruitment this intake was higher in Nyabula than Kikelelwa ( $p < 0.001$ ) and Kigwa ( $p < 0.01$ ) while at 12 months from recruitment, the intake was statistically lower at Kikelelwa than Nyabula ( $p < 0.01$ ) and Kigwa ( $p < 0.05$ ).

**Table S3.** Percent of children consuming groundnuts during the previous week before each sampling time.

| <b>Days per week</b>              | <b>Nyabula</b> | <b>Kigwa</b> | <b>Kikelelwa</b> |
|-----------------------------------|----------------|--------------|------------------|
| <b>At recruitment</b>             |                |              |                  |
| 0                                 | 81             | 68           | 79               |
| 1 to 3                            | 13             | 2            | 5                |
| 4 to 7                            | 6              | 30           | 16               |
| <b>6 months from recruitment</b>  |                |              |                  |
| 0                                 | 87             | 68           | 85               |
| 1 to 3                            | 4              | 24           | 7.5              |
| 4 to 7                            | 9              | 8            | 7.5              |
| <b>12 months from recruitment</b> |                |              |                  |
| 0                                 | 77             | 22           | 75               |
| 1 to 3                            | 11             | 65           | 17               |
| 4 to 7                            | 12             | 13           | 8                |

**Table S4.** Percentile distribution of geometric mean levels (95% CI) of AF-alb (pg/mg) and UFB1 (pg/mL) by village and sampling time.

| Sampling time and village         | AF-alb<br>2.5 <sup>th</sup> percentile | AF-alb<br>50 <sup>th</sup> percentile | AF-alb<br>97.5 <sup>th</sup> percentile | UFB1<br>2.5 <sup>th</sup> percentile | UFB1<br>50 <sup>th</sup> percentile | UFB1<br>97.5 <sup>th</sup> percentile |
|-----------------------------------|----------------------------------------|---------------------------------------|-----------------------------------------|--------------------------------------|-------------------------------------|---------------------------------------|
| <b>At recruitment</b>             |                                        |                                       |                                         |                                      |                                     |                                       |
| Nyabula                           | < LOD                                  | < LOD                                 | 8.2 (4.3, 15.4)                         | 72.8 (52.8, 100.5)                   | 202.4 (177.1, 231.3)                | 842.4 (653.9, 1085.3)                 |
| Kigwa                             | < LOD                                  | 5.8 (5.1, 6.5)                        | 16.5 (12.6, 21.7)                       | 115.8 (29.5, 455.2)                  | 253.7 (207.6, 310.1)                | 1297.7 (944.2, 1783.6)                |
| Kikelelwa                         | < LOD                                  | 3.2 (3.1, 3.3)                        | 9.5 (6.7, 13.5)                         | < LOD                                | 87.6 (68.7, 111.8)                  | 579.0 (421.0, 796.3)                  |
| <b>6 months from recruitment</b>  |                                        |                                       |                                         |                                      |                                     |                                       |
| Nyabula                           | < LOD                                  | 6.4 (5.2, 7.9)                        | 65.4 (47.3, 90.2)                       | 27.1 (1.0, 696)                      | 111.1 (92.1, 133.9)                 | 469.9 (350.4, 630.1)                  |
| Kigwa                             | < LOD                                  | 20.4 (16.0, 26.0)                     | 110.5 (72.1, 169.4)                     | 30 <sup>a</sup>                      | 150.6 (114.9, 197.3)                | 811.6 (486.2, 1354.9)                 |
| Kikelelwa                         | < LOD                                  | 3.2 (3.1, 3.2)                        | 7.4 (5.3, 10.2)                         | < LOD                                | 40.9 (32.6, 51.4)                   | 229.2 (165.4, 317.6)                  |
| <b>12 months from recruitment</b> |                                        |                                       |                                         |                                      |                                     |                                       |
| Nyabula                           | < LOD                                  | 13.4 (12.2, 14.6)                     | 35.9 (26.9, 47.9)                       | 79.0 (67.2, 92.8)                    | 343.6 (263.0, 448.9)                | 2437.0 (1841.2, 3225.6)               |
| Kigwa                             | 13.8 <sup>a</sup>                      | 23.4 (19.7, 27.7)                     | 104.7 (66.7, 164.2)                     | 126 <sup>a</sup>                     | 357.1 (279.7, 456.0)                | 1448.1 (1089.6, 1925.1)               |
| Kikelelwa                         | 4.2 (0.5, 34.2)                        | 9.3 (8.4, 10.2)                       | 30.5 (21.5, 43.2)                       | 28.1 (3.7, 12.8)                     | 146.1 (116.9, 182.7)                | 821.0 (572.7, 1176.8)                 |

<sup>a</sup>One observation only; LOD is limit of detection.
